# Supplementary material
Source: publisher site journal article supplement (https://www.degruyterbrill.com/publication/isbn/9783110363463/downloadAsset/9783110363463_Inhaltsverzeichnis--de.pdf)
Supplement: Supplementary file 1 [file 9783110363463_Inhaltsverzeichnis--de.pdf]

# Inhaltsverzeichnis

|                                         |     |
|-----------------------------------------|-----|
| <i>Ein Billett von Jenny Lind</i> ..... | 1   |
| <i>Auf der Eisenbahn</i> .....          | 15  |
| <i>Einer von unsere Leut'</i> .....     | 45  |
| Kommentar .....                         | 117 |
| Editorische Hinweise .....              | 134 |
| Nachwort .....                          | 140 |
| Literaturverzeichnis.....               | 169 |
